# Supplementary material for: Dual Function of CCAT2 in Regulating Luminal Subtype of Breast Cancer Depending on the Subcellular Distribution
Source: MDPI journal article supplement (doi:10.3390/cancers15020538), 2023-01-16

## **Dual function of CCAT2 in regulating luminal subtype of breast cancer depending on the subcellular distribution**

**Supplemental Figure S1:** Correlation between CCAT2 levels and disease-free survival (A) and overall survival (B) in triple negative breast cancer (TNBC) patients.

**Supplemental Figure S2:** A. ALDH<sup>+</sup> CSC analysis in T47D cells with or without pcDNA3.1-mediated overexpression of CCAT2. DEAB was used in the negative controls of ALDH assay. B. Quantitative analysis of ALDH<sup>+</sup> CSCs in A. C. Downregulation of stemness genes h-TERT, NANOG, SOX2, KLF4 and OCT4 by pcDNA3.1-mediated overexpression of CCAT2 in T47D cells. D. Mammosphere assays in T47D cells with or without pcDNA3.1-mediated overexpression of CCAT2. E. Quantitative analysis of the number and average diameter of the spheres in D. Data are presented as the mean  $\pm$  SEM (n=3). \*p<0.05, \*\*p<0.01.

**Supplemental Figure S3: Oncogenic function of pMX-CCAT2 in T47D cells.** A. Induction of cell proliferation by pMX-CCAT2 in T47D cells. B. Upregulation of stemness genes h-TERT, NANOG, SOX2, KLF4 and OCT4 by pMX-CCAT2 in T47D cells. C. Promotion of ALDH<sup>+</sup> CSCs in T47D cells after infection with pMX-CCAT2. DEAB was used in the negative controls of ALDH assay. Data are presented as the mean  $\pm$  SEM (n=3). \*p<0.05, \*\*p<0.01.

**Supplemental Figure S4: Original blots for western blot images of Figure 3F, 4E and 5L.**

Supplemental Figure S 1

A

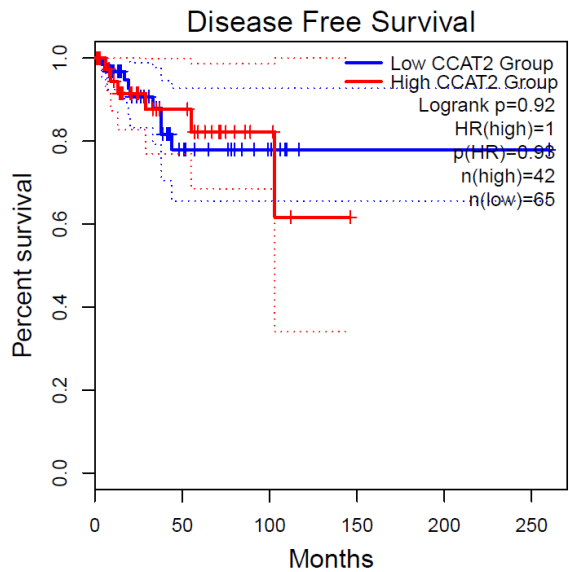

B

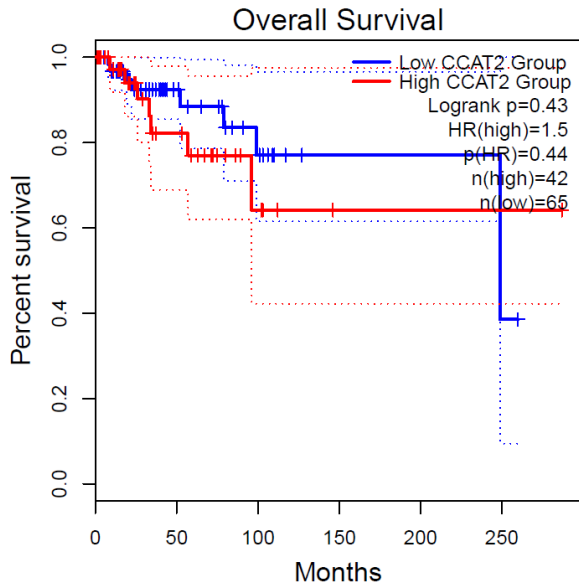

Supplemental Figure S 2

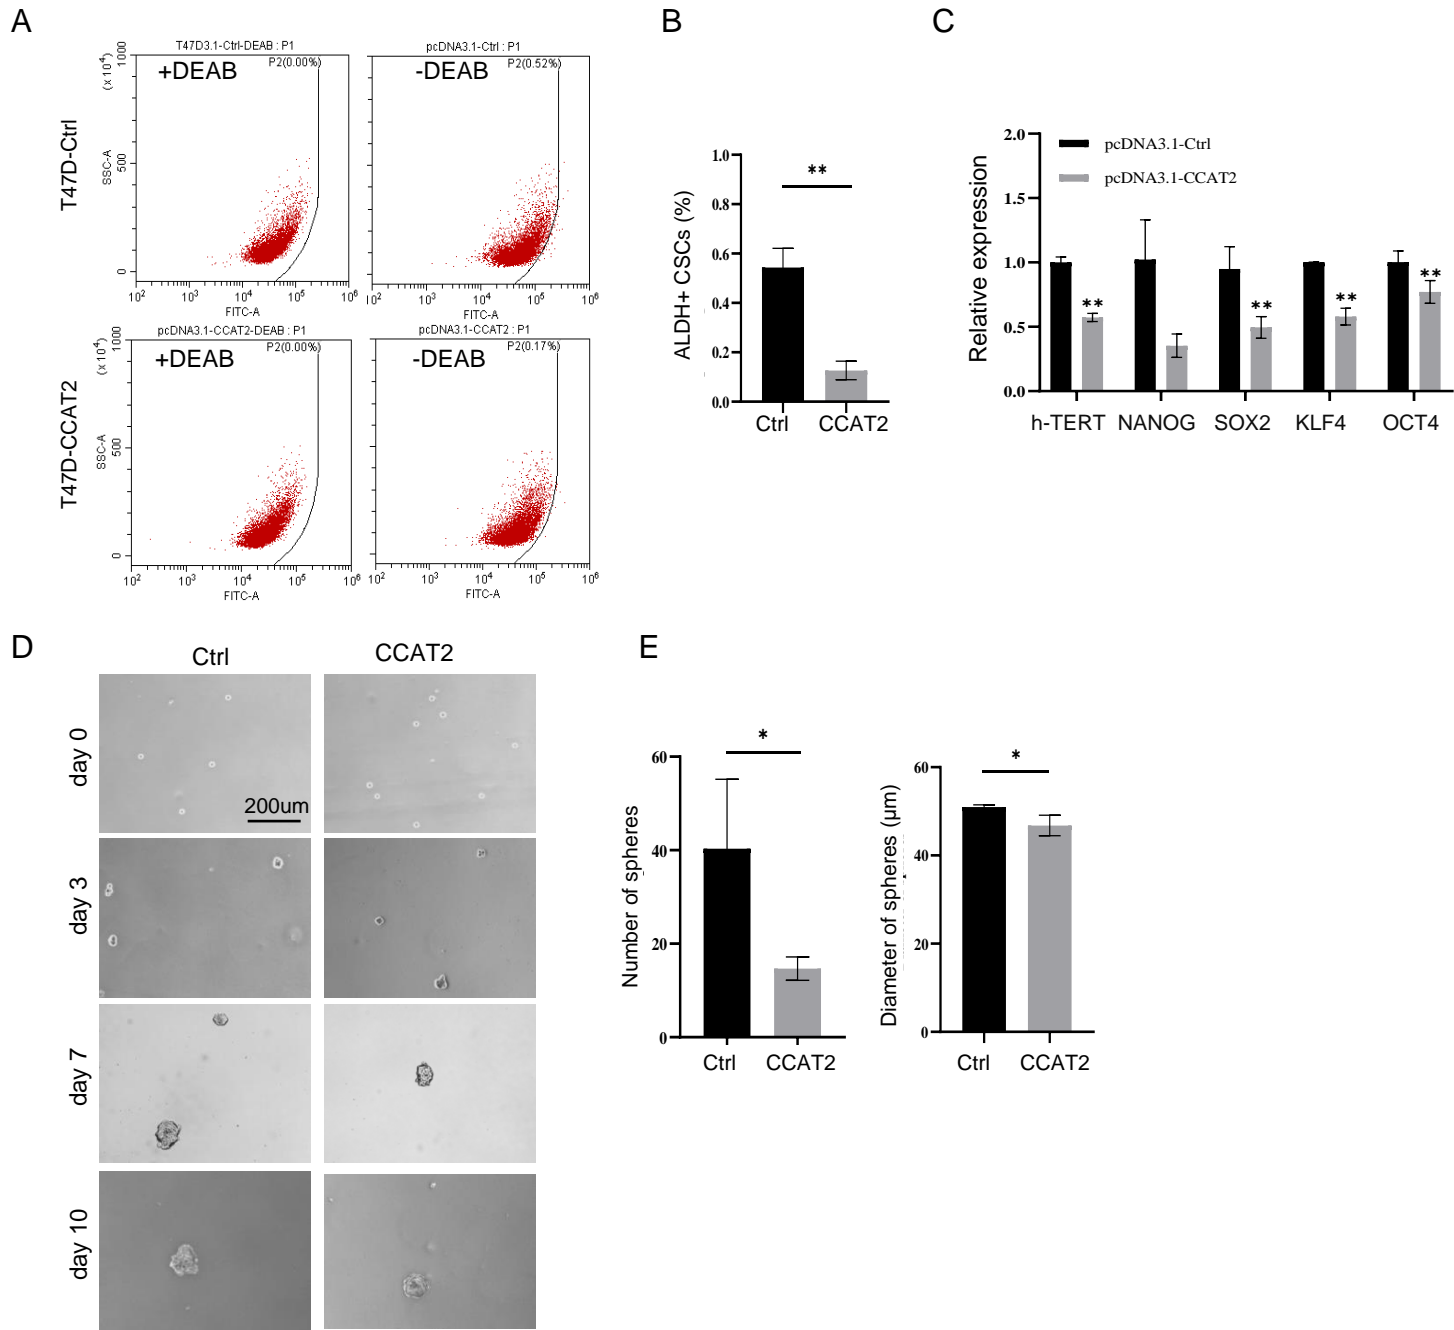

Supplemental Figure S3

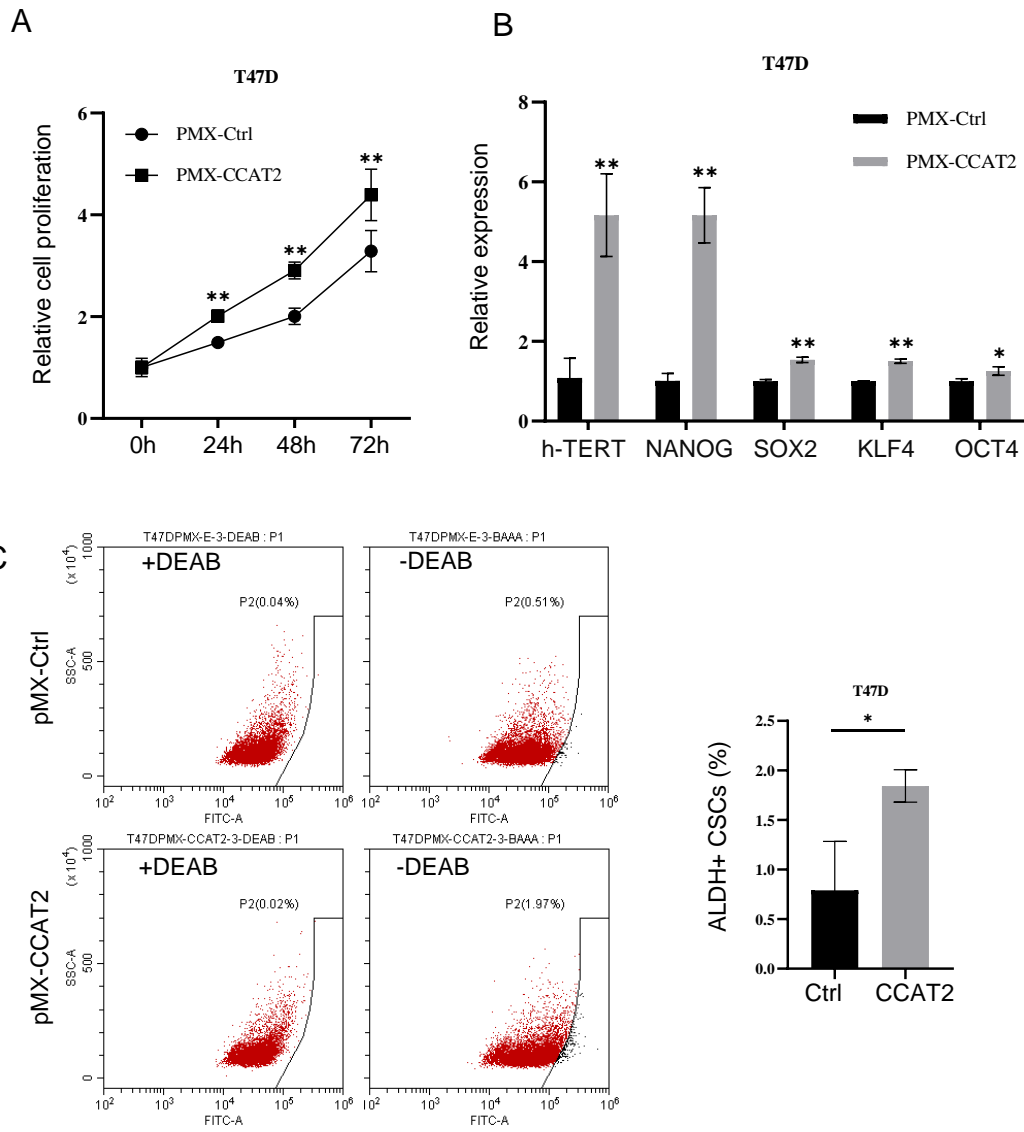

A: Original blots for Figure 3F

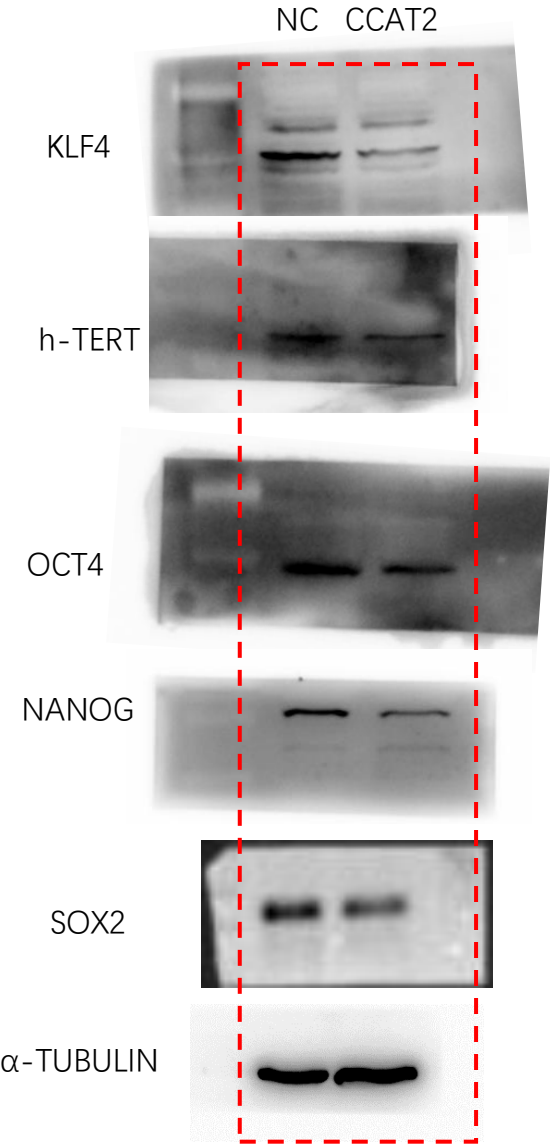

B: Original blots for Figure 4E

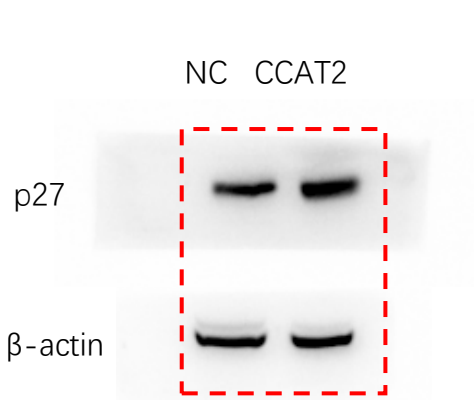

C: Original blots for Figure 5L

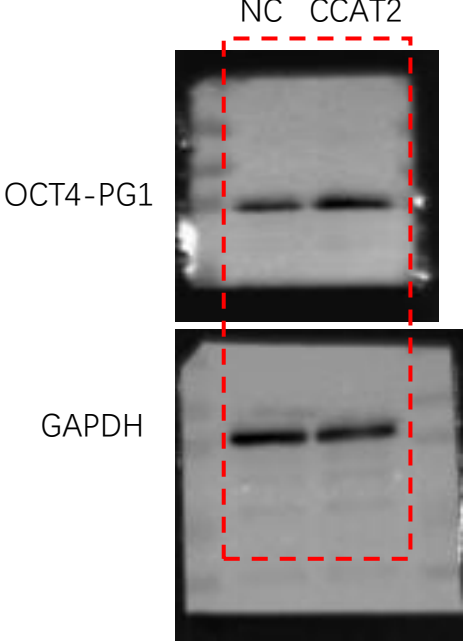

Supplement: s1 [file s1]
